# Supplementary material for: Rapid screening and quantification of heavy metals in traditional Chinese herbal medicines using monochromatic excitation energy dispersive X-ray fluorescence spectrometry
Source: Royal Society of Chemistry journal article supplement (doi:10.1039/d2an00752e), 2022-01-01
Supplement: d2an00752e1.pdf [file d2an00752e1.pdf]

## Supporting Information

### **Rapid screening and quantification of heavy metals in traditional Chinese herbal medicines using monochromatic excitation energy dispersive X-ray fluorescence spectrometry**

Xing Ma <sup>a, b, †</sup>, Marti Z. Hua <sup>c, †</sup>, Chao Ji <sup>d</sup>, Jing Zhang <sup>b</sup>, Rui Shi <sup>e</sup>, Yabing Xiao <sup>b</sup>, Xiaojing Liu <sup>f</sup>, Xiahong He <sup>d, e, \*</sup>, Wenjie Zheng <sup>a, \*</sup>, Xiaonan Lu <sup>c, \*</sup>

<sup>a</sup> Laboratory for Quality Control and Traceability of Food, Tianjin Normal University, Tianjin 300387, China

<sup>b</sup> The Animal, Plant & Foodstuff Inspection Center of Tianjin Customs, Tianjin 300387, China

<sup>c</sup> Department of Food Science and Agricultural Chemistry, McGill University Macdonald Campus. 21111 Lakeshore Road, Sainte-Anne-de-Bellevue, QC, H9X 3V9, Canada.

<sup>d</sup> State Key Laboratory for Conservation and Utilization of Bio-Resources in Yunnan, Yunnan Agricultural University, Kunming 650201, China

<sup>e</sup> Key Laboratory for Forest Resources Conservation and Utilization in the Southwest Mountains of China, Ministry of Education, Southwest Landscape Architecture Engineering Research Center of National Forestry and Grassland Administration, Southwest Forestry University, Kunming, Yunnan 650224, China

<sup>f</sup> Beijing Ancoren Technology, Beijing 100000, China

<sup>†</sup> These authors contributed equally to this work.

<sup>\*</sup> Corresponding author. Email address: hexiahong@hotmail.com (Xiahong He); skyzwj@tjnu.edu.cn (Wenjie Zheng); xiaonan.lu@mcgill.ca (Xiaonan Lu)

**Table S1.** Operating parameters of ICP-MS/MS

| <b>Parameter</b>          | <b>Operating condition</b> |
|---------------------------|----------------------------|
| RF power                  | 1500 W                     |
| Sampling depth            | 8.0 mm                     |
| Number of replicates      | 3                          |
| Stabilization time        | 10 s                       |
| Auxiliary gas flow rate   | 0.40 L/min                 |
| Makeup gas flow rate      | 0.20 L/min                 |
| Carrier gas flow rate     | 1.05 L/min                 |
| Spray chamber temperature | 2.0°C                      |
| Quadrupole bias V         | -16 V                      |
| Octo pole bias V          | -18 V                      |
| Operational mode          | He mode                    |
